# Supplementary material
Source: PubMed Central journal article supplement (PMC7753785)
Supplement: BCP-87-3408-s002.pdf [file BCP-87-3408-s002.pdf]

|                                             | Candidate                                  | Phase I           |                   |                   | Phase I/II        |                   |                           | Phase II          |               |                | Phase III         |                   |                                                                                              | Phase IV          |                   |               |
|---------------------------------------------|--------------------------------------------|-------------------|-------------------|-------------------|-------------------|-------------------|---------------------------|-------------------|---------------|----------------|-------------------|-------------------|----------------------------------------------------------------------------------------------|-------------------|-------------------|---------------|
|                                             |                                            | Patients enrolled | Age range         | Location          | Patients enrolled | Age range (years) | Location                  | Patients enrolled | Age range     | Location       | Patients enrolled | Age range (years) | Location                                                                                     | Patients enrolled | Age range (years) | Location      |
| Traditionally inactivated or weakened virus | CoronaVac                                  |                   |                   |                   | 422               | ≥60               | China                     |                   |               |                | 8870              | ≥60 & 18 - 59     | Brazil                                                                                       |                   |                   |               |
|                                             |                                            |                   |                   |                   | 744               | 18 - 59           |                           |                   |               |                | 1620              | 18 - 59           | Indonesia                                                                                    |                   |                   |               |
|                                             |                                            |                   |                   |                   | 552               | 3 - 17            |                           |                   |               |                | 13000             | 3 - 17            | Turkey                                                                                       |                   |                   |               |
|                                             | Unnamed Inactive Vaccine - Wuhan           |                   |                   |                   | 320               | 18 - 59           | China                     |                   |               |                | 15000             | ≥18               | UAE & China                                                                                  |                   |                   |               |
|                                             |                                            |                   |                   |                   |                   |                   |                           |                   |               |                | 600               | ≥18               | Morocco&China                                                                                |                   |                   |               |
|                                             | BBiP-CoV                                   |                   |                   |                   | 540               | 18-80             | China                     |                   |               |                | 15000             | ≥18               | UAE & China                                                                                  |                   |                   |               |
|                                             |                                            |                   |                   |                   |                   |                   |                           |                   |               |                | 3000              | 18 - 65           | Argentina                                                                                    |                   |                   |               |
|                                             | BBV152A, B, C                              |                   |                   |                   | 755               | ≥18 to ≤55        | India                     |                   |               |                | 25800             | ≥18               | India                                                                                        |                   |                   |               |
|                                             |                                            |                   |                   |                   | 124               | 12 - 65           | India                     |                   |               |                |                   |                   |                                                                                              |                   |                   |               |
|                                             | QazCovid-in                                |                   |                   |                   | 244               | ≥18               | Republic of Kazakhstan    |                   |               |                |                   |                   |                                                                                              |                   |                   |               |
| Unnamed Inactive Vaccine - Yunnan           |                                            |                   |                   | 942               | 18 - 59           | China             |                           |                   |               |                |                   |                   |                                                                                              |                   |                   |               |
|                                             |                                            |                   |                   | 471               | ≥60               | China             |                           |                   |               |                |                   |                   |                                                                                              |                   |                   |               |
| Unnamed inactivated SARS-CoV-2 Vaccine      | 180                                        | ≥18               | China             |                   |                   |                   | 1000                      | ≥18               | China         |                |                   |                   |                                                                                              |                   |                   |               |
| Viral Vector                                | AD21222 (ChAdOx1 nCoV-19)                  |                   |                   |                   | 2000              | 18 - 65           | South Africa              |                   |               |                | 2000              | 18 - 55           | United Kingdom                                                                               |                   |                   |               |
|                                             |                                            |                   |                   |                   | 1112              | 18 - 55           | United Kingdom            | 12390             | ≥18           | United Kingdom | 30000             | ≥18               | United States                                                                                |                   |                   |               |
|                                             |                                            |                   |                   |                   | 12                | ≥18               | Japan                     |                   |               |                | 100               | ≥18               | Russia                                                                                       |                   |                   |               |
|                                             | Ad5-nCoV                                   | 108               | 18 - 60           | China             |                   |                   |                           | 500               | ≥18           | China          | 1600              | ≥18               | India                                                                                        |                   |                   |               |
|                                             |                                            | 89                | 18 - 60           | China             |                   |                   |                           | 481               | ≥6            | China          | 40000             | ≥18               | Pakistan                                                                                     |                   |                   |               |
|                                             |                                            |                   |                   |                   |                   |                   |                           | 508               | ≥18           | China          | 500               | 18 - 85           | Russia                                                                                       |                   |                   |               |
|                                             | Gam-COVID-Vac (rAd26-S+rAd5-S)             |                   |                   |                   | 38                | 18 - 60           | Russia                    |                   |               |                | 40000             | ≥18               | Russia                                                                                       |                   |                   |               |
|                                             |                                            |                   |                   |                   | 38                | 18 - 60           | Russia                    | 110               | ≥60           | Russia         | 100               | 18 - 60           | Belarus                                                                                      |                   |                   |               |
|                                             | Ad26.COV2.S                                | 250               | 20 - 55           | Japan             | 1045              | 18 - 55           | United States & Belgium   |                   |               |                | 60000             | ≥18               | U.S., Brazil, Argentina, Chile, Colombia, Mexico, Peru, South Africa, Ukraine, Spain, France |                   |                   |               |
|                                             | DeIN1S-2019-nCoV-RBD-OPT1                  | 60                | ≥18               | China             |                   |                   |                           | 720               | 18 - 60       | China          |                   |                   |                                                                                              |                   |                   |               |
|                                             | TMV-083                                    | 90                | 18 - 55           | Belgium & France  |                   |                   |                           |                   |               |                |                   |                   |                                                                                              |                   |                   |               |
|                                             | GRAd-COV2                                  | 90                | 18 - 55           | Italy             |                   |                   |                           |                   |               |                |                   |                   |                                                                                              |                   |                   |               |
|                                             | Ad5-nCoV                                   | 144               | ≥18               | China             |                   |                   |                           |                   |               |                |                   |                   |                                                                                              |                   |                   |               |
|                                             | Oral SARS-CoV-2 VX (VXA-CoV2-1)            | 48                | 18 - 54           | United States     |                   |                   |                           |                   |               |                |                   |                   |                                                                                              |                   |                   |               |
|                                             | MVA-SARS-2-S                               | 30                | 18 - 55           | Germany           |                   |                   |                           |                   |               |                |                   |                   |                                                                                              |                   |                   |               |
| IIBR-100                                    |                                            |                   |                   | 1040              | 18 - 85           | Israel            |                           |                   |               |                |                   |                   |                                                                                              |                   |                   |               |
| hAd5-S-Fusion+ N-ETSD                       | 35                                         | 18 - 55           | United States     |                   |                   |                   |                           |                   |               |                |                   |                   |                                                                                              |                   |                   |               |
| V590                                        | 252                                        | ≥18               | United States     |                   |                   |                   |                           |                   |               |                |                   |                   |                                                                                              |                   |                   |               |
| Nucleic acids (RNA/DNA vaccines)            | mRNA-1273                                  | 45                | 18 - 55           | United States     |                   |                   |                           | 600               | ≥18           | United States  | 30000             | ≥18               | United States                                                                                |                   |                   |               |
|                                             |                                            | 40                | 56 - 70 & ≥71     | United States     |                   |                   |                           |                   |               |                |                   |                   |                                                                                              |                   |                   |               |
|                                             | BNT162(b1,b2,b3) (3 LNP-mRNAs)             | 195               | 18 - 55 & 65 - 85 | United States     | 444               | 18 - 55 & 56 - 85 | Germany                   |                   |               |                | 43998             | ≥16               | U.S., Argentina, Brazil, South Africa, Turkey, Germany                                       |                   |                   |               |
|                                             |                                            |                   |                   |                   | 144               | 18 - 55 & >55     | China                     |                   |               |                |                   |                   |                                                                                              |                   |                   |               |
|                                             |                                            |                   |                   |                   | 120               | 18 - 55 & 56 - 85 | Germany                   |                   |               |                |                   |                   |                                                                                              |                   |                   |               |
|                                             | CvriCoV (mRNA)                             | 168               | 18 - 60           | Belgium & Germany |                   |                   |                           | 691               | 18 - 60 & >60 | Peru           |                   |                   |                                                                                              |                   |                   |               |
|                                             | LUNAR-COV19 (ARCT-021) (RNA)               |                   |                   |                   | 92                | 21 - 55 & 56 - 80 | Singapore                 |                   |               |                |                   |                   |                                                                                              |                   |                   |               |
|                                             | LNP-nCoVsaRNA                              | 105               | 18 - 45           | United Kingdom    |                   |                   |                           |                   |               |                |                   |                   |                                                                                              |                   |                   |               |
|                                             | Unnamed mRNA vaccine                       | 168               | 18 - 80           | China             |                   |                   |                           |                   |               |                |                   |                   |                                                                                              |                   |                   |               |
|                                             | INO-4800 (DNA)                             |                   |                   |                   | 160               | 19 - 64           | South Korea               |                   |               |                |                   |                   |                                                                                              |                   |                   |               |
|                                             |                                            |                   |                   |                   | 120               | ≥18               | United States             |                   |               |                |                   |                   |                                                                                              |                   |                   |               |
|                                             | AG0301-COV19 (DNA)                         |                   |                   |                   | 30                | 20 - 65           | Japan                     |                   |               |                |                   |                   |                                                                                              |                   |                   |               |
|                                             |                                            |                   |                   | 30                | 20 - 65           | Japan             |                           |                   |               |                |                   |                   |                                                                                              |                   |                   |               |
| ZyCoV-D (DNA)                               |                                            |                   |                   | 1048              | 18 - 55           | India             |                           |                   |               |                |                   |                   |                                                                                              |                   |                   |               |
| GX-19 (DNA)                                 |                                            |                   |                   | 210               | 18 - 50           | South Korea       |                           |                   |               |                |                   |                   |                                                                                              |                   |                   |               |
| bacTRL-Spike (DNA)                          | 12                                         | ≥18               | Australia         |                   |                   |                   |                           |                   |               |                |                   |                   |                                                                                              |                   |                   |               |
| Protein subunit                             | NVX-CoV2373                                |                   |                   |                   | 1419              | 18 - 84           | United States & Australia | 2904              | 18 - 64       | South Africa   | 9000              | 18 - 84           | United Kingdom                                                                               |                   |                   |               |
|                                             | KBP-COVID-19                               |                   |                   |                   | 180               | 18 - 49 & 50 - 70 | United States             |                   |               |                |                   |                   |                                                                                              |                   |                   |               |
|                                             | Unnamed Protein Subunit Vaccine            |                   |                   |                   | 440               | ≥18               | United States             |                   |               |                |                   |                   |                                                                                              |                   |                   |               |
|                                             | Unnamed Recombinant Vaccine - Anhui        | 50                | 18 - 59           | China             | 50                | ≥60               | China                     | 900               | 18 - 59       | China          |                   |                   |                                                                                              |                   |                   |               |
|                                             | EpiVacCorona                               | 100               | 18 - 60           | Russia            |                   |                   |                           |                   |               |                |                   |                   |                                                                                              |                   |                   |               |
|                                             | SCB-2019                                   | 150               | 18 - 75           | Australia         |                   |                   |                           |                   |               |                |                   |                   |                                                                                              |                   |                   |               |
|                                             | Unnamed Spike Protein Candidate            | 120               | 18 - 55           | Australia         |                   |                   |                           |                   |               |                |                   |                   |                                                                                              |                   |                   |               |
|                                             |                                            | 216               | 18 - 55 & ≥56     | Australia         |                   |                   |                           |                   |               |                |                   |                   |                                                                                              |                   |                   |               |
|                                             | COVAX-19                                   | 40                | 18 - 65           | Australia         |                   |                   |                           |                   |               |                |                   |                   |                                                                                              |                   |                   |               |
|                                             | MVC-COV1901                                | 45                | 20 - 50           | Taiwan            |                   |                   |                           |                   |               |                |                   |                   |                                                                                              |                   |                   |               |
|                                             | UB-612                                     | 60                | 20 - 55           | Taiwan            |                   |                   |                           |                   |               |                |                   |                   |                                                                                              |                   |                   |               |
|                                             | Unnamed Recombinant Vaccine                | 168               | ≥18               | China             |                   |                   |                           |                   |               |                |                   |                   |                                                                                              |                   |                   |               |
|                                             | FINLAY-FR-1 anti SARS-CoV-2                |                   |                   |                   | 676               | 19 - 59 & 60 - 80 | Cuba                      |                   |               |                |                   |                   |                                                                                              |                   |                   |               |
|                                             | CoVac-1                                    | 36                | ≥18               | Germany           |                   |                   |                           |                   |               |                |                   |                   |                                                                                              |                   |                   |               |
|                                             | Unnamed adjuvanted protein subunit vaccine | 360               | 18 - 55           | India             |                   |                   |                           |                   |               |                |                   |                   |                                                                                              |                   |                   |               |
| RBD-HBsAg VLPs                              |                                            |                   |                   | 280               | 18 - 79           | Australia         |                           |                   |               |                |                   |                   |                                                                                              |                   |                   |               |
| Unnamed VLP Vaccine                         | 180                                        | 18 - 55           | Canada            |                   |                   |                   |                           |                   |               |                |                   |                   |                                                                                              |                   |                   |               |
| Repurposed                                  | Measles-Mumps-Rubella Vaccine              |                   |                   |                   |                   |                   |                           |                   |               |                | 200               | 18 - 50           | Egypt                                                                                        | 100               | 18 - 50           | Netherlands   |
|                                             |                                            |                   |                   |                   |                   |                   |                           |                   |               |                | 60                | 18 - 70           | United States                                                                                |                   |                   |               |
|                                             | Bacille Calmette-Guerin                    |                   |                   |                   |                   |                   |                           |                   |               |                | 31545             | ≥18               | Several                                                                                      | 10964             | ≥18               | Several       |
|                                             | Oral Polio Vaccine                         |                   |                   |                   |                   |                   |                           |                   |               |                | 3600              | ≥18               | United States & New Zealand                                                                  | 3400              | ≥50               | Guinea-Bissau |
|                                             | IMM-101                                    |                   |                   |                   |                   |                   |                           |                   |               |                | 1500              | ≥18               | Canada                                                                                       |                   |                   |               |
|                                             | BACMUNE (MV130)                            |                   |                   |                   |                   |                   |                           |                   |               |                | 3312              | 18 - 65           | Mexico                                                                                       |                   |                   |               |
|                                             | RUTI                                       |                   |                   |                   |                   |                   |                           |                   |               |                | 315               | ≥18               | Spain                                                                                        |                   |                   |               |
| NasoVAX                                     |                                            |                   |                   |                   |                   |                   | 96                        | ≥18               | United States |                |                   |                   |                                                                                              |                   |                   |               |
| Shingrix                                    | 250                                        | ≥65               | United States     |                   |                   |                   |                           |                   |               |                |                   |                   |                                                                                              |                   |                   |               |
